# Supplementary material for: Blending Ethnomedicine with Modern Technology—From Conventional to Tailored Products: Modulating Biopharmaceutical Properties of Berberis Extract by Solid Lipid Nanoparticles for Wound Healing
Source: MDPI journal article supplement (doi:10.3390/jfb14080418), 2023-08-09
Supplement: s1 [file s1]

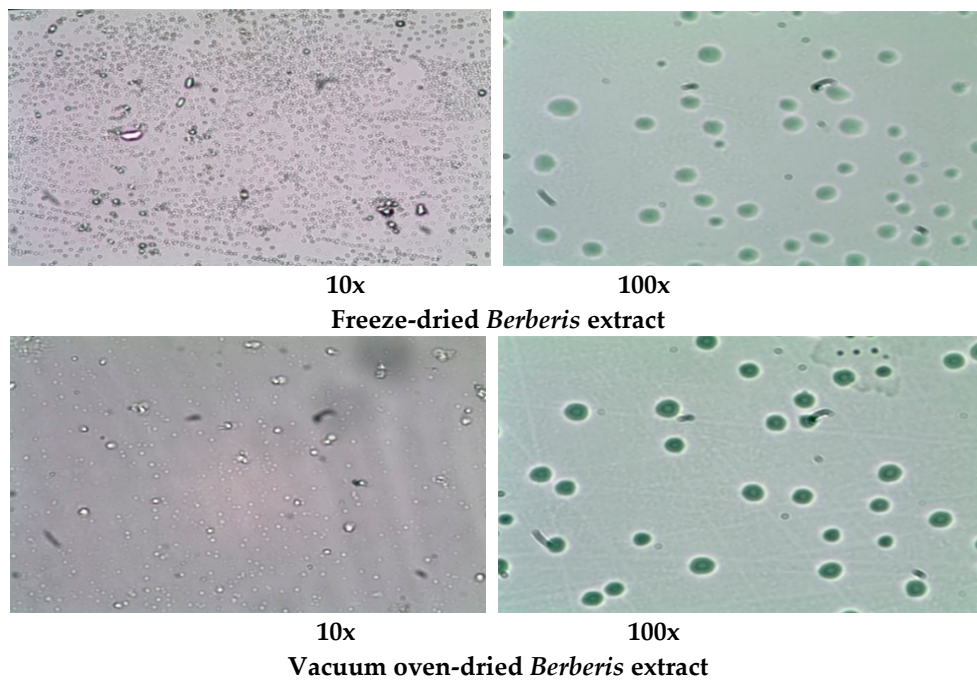

Figure S1: Optical microscopy of *Berberis* extract

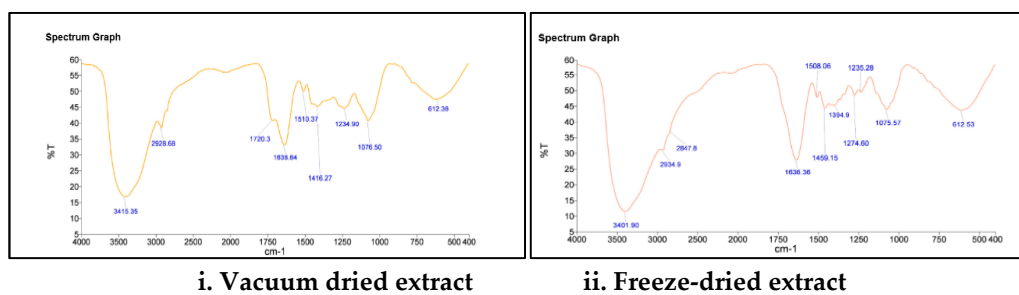

Figure S2: FT-IR spectra of vacuum dried and freeze-dried *Berberis* extract

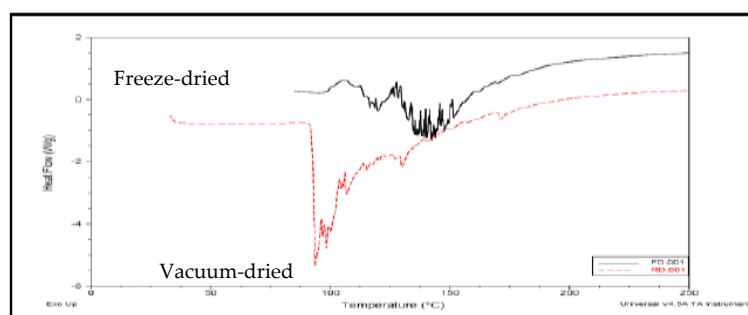

Figure S3: DSC curves of vacuum dried and freeze-dried *Berberis* extract

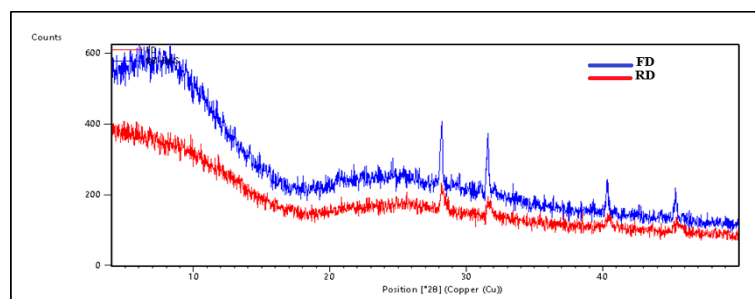

Figure S4: X-ray diffraction spectra vacuum dried (RD) and freeze-dried *Berberis* extract (FD)

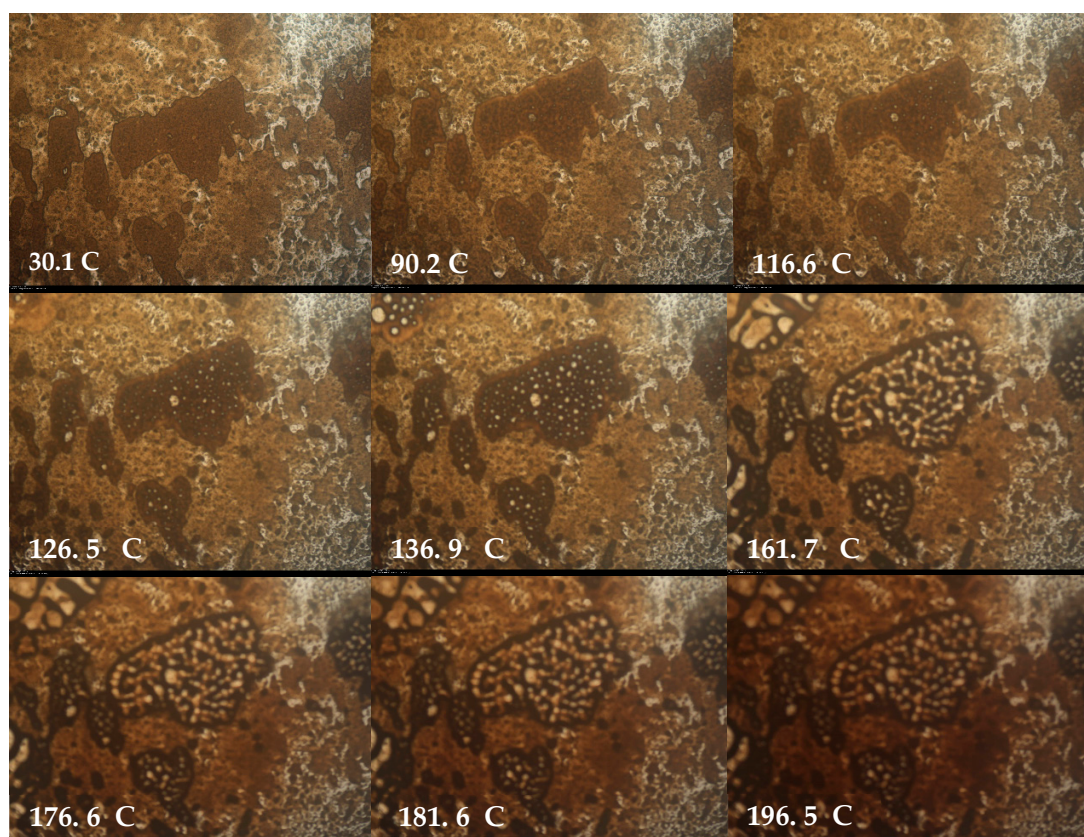

Figure S5: HSM images of vacuum oven-dried *Berberis* extract at different temperatures

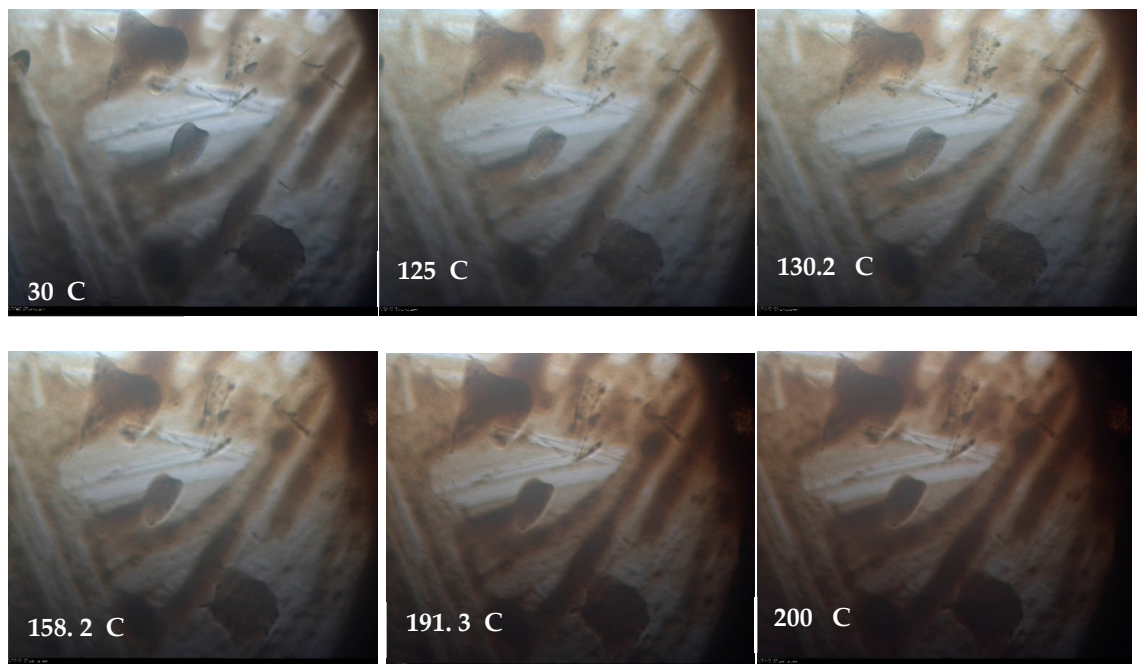

Figure S6: HSM images of freeze-dried *Berberis* extract at different temperatures

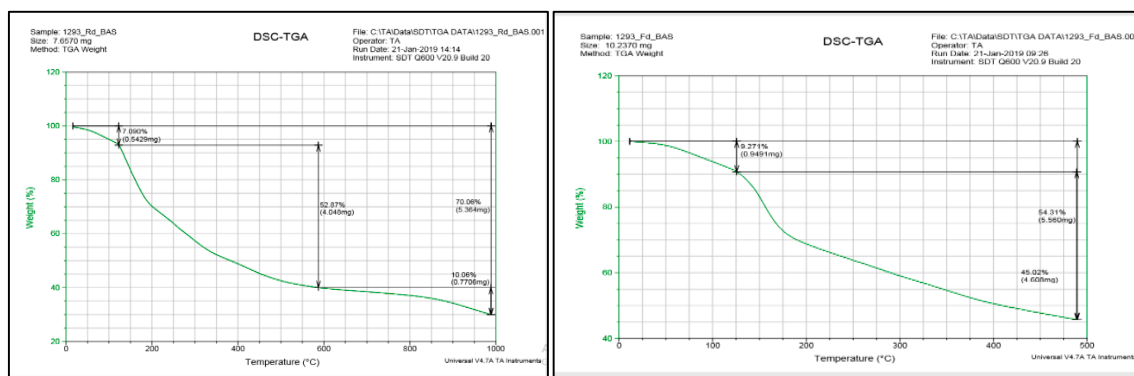

Figure S7: TGA of vacuum dried and freeze-dried *Berberis* extract
